# Supplementary material
Source: Springer Nature journal article supplement (https://www.springermedizin.de/resource/supplementary/12943_2007_307_MOESM2_ESM.pdf/9553890)

Control

TRAIL

Curcumin

Curcumin + TRAIL

Bak

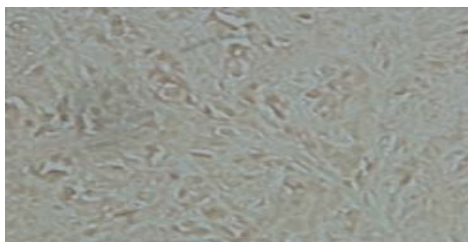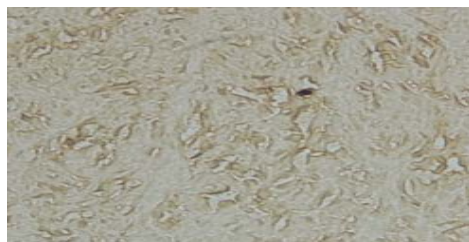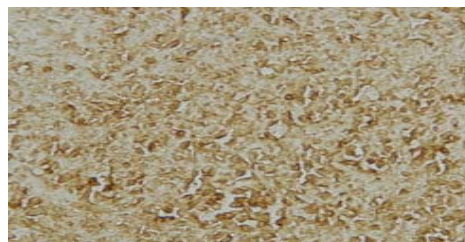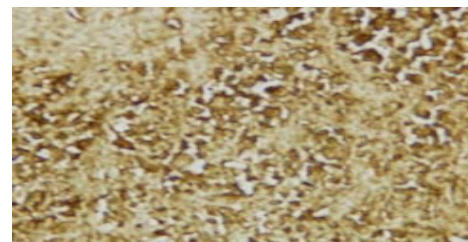

Bax

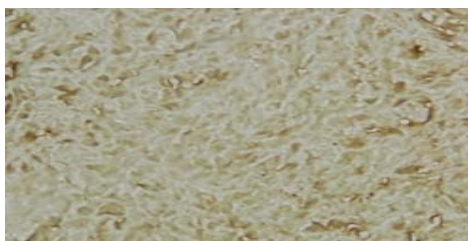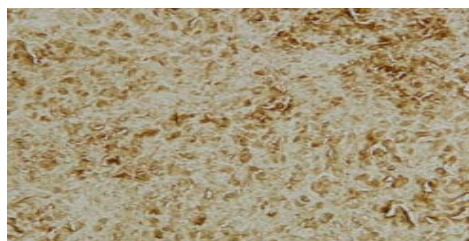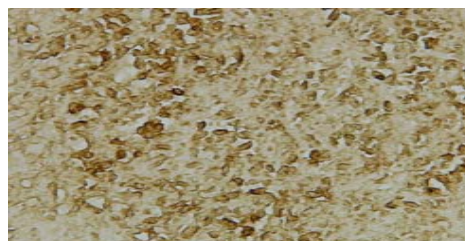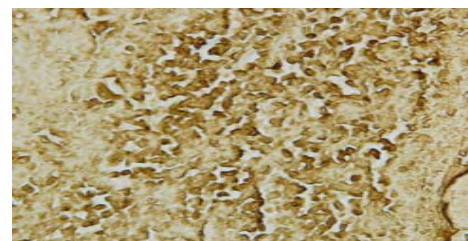

Bcl-2

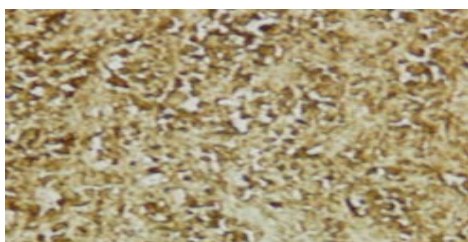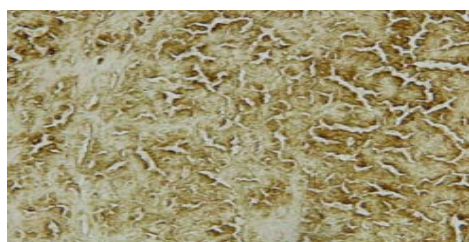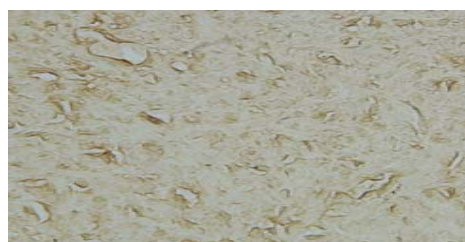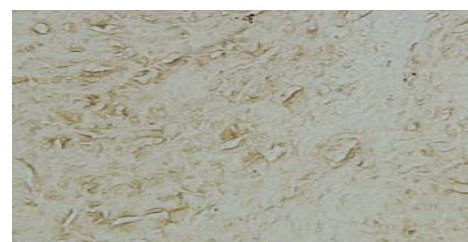

Bcl-X<sub>L</sub>

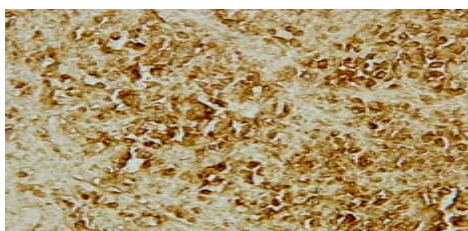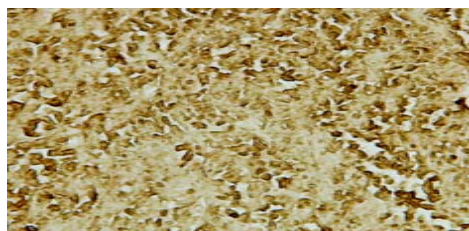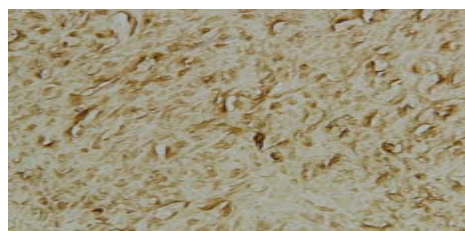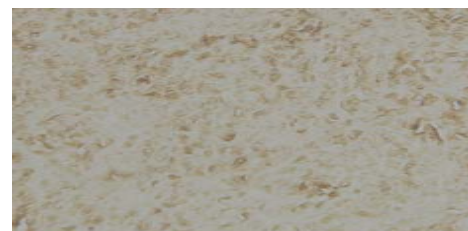

DR4

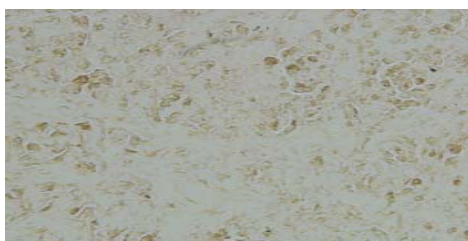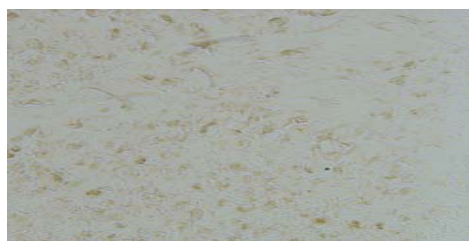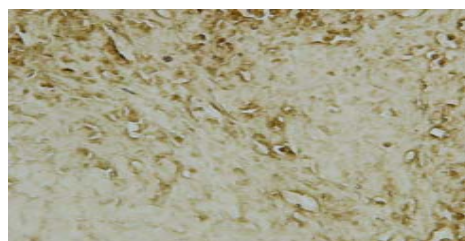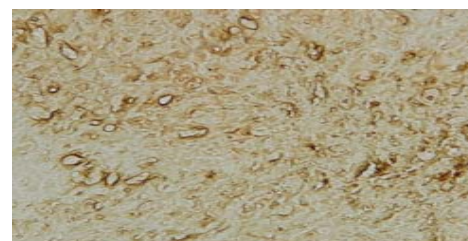

DR5

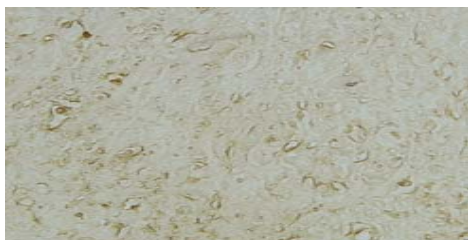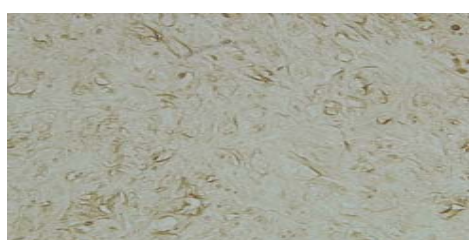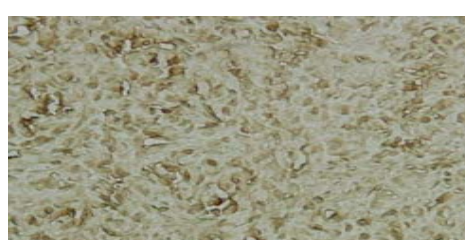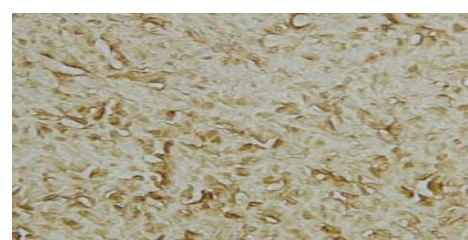

Supplement: MOESM2 [file 9553890]
